# Supplementary material
Source: Elsevier journal article supplement (https://www.sciencedirect.com/science/article/pii/S2341192919301672)
Supplement: mmc1 [file S2341192919301672:mmc1.docx]

**ANEXO ONLINE**

**PRACTICES FOR PRESIMULATION BRIEFING**

Healthcare and Allied Health professionals take psychological risks when they allow their performance to be observed and analyzed by peers and instructors. Thus, developing and maintaining a psychologically safe learning environment is essential for getting everyone’s participation.

The Debriefing Assessment for Simulation in Healthcare (DASH) or *Evaluación del Debriefing para Simulación en Salud* (EDSS, linguistically and culturally validated version in Spanish) developed by the Center for Medical Simulation in Boston (MA, USA), provides instructions and examples to accurately assess and score the prebriefing conversation.

Specific practices for instructors or debriefers include:

- Clarifies course objectives, environment, confidentiality, roles, and expectations.
- Establishes a “fiction contract” with participants.
- Attends to logistical details.
- Conveys a commitment to respecting learners and understanding their perspective.

The Center for Medical Simulation provides open access online to the DASH and EDSS at https://harvardmedsim.org/

Rationale for a strong presimulation briefing following the previously described approach can be found in the following references:

- Rudolph JW, Raemer DB, Simon R. Establishing a safe container for learning in simulation: the role of the presimulation briefing. Simul Healthc. 2014 Dec;9(6):339-49.
- Szyld D, Rudolph JW. Debriefing with Good Judgment. In: A.I. Levine et al. (eds.), *The Comprehensive Textbook of Healthcare Simulation*. Springer Science+Business Media; New York, 2013.
- Leon-Castelao E, Maestre JM. Prebriefing en simulación clínica: análisis del concepto y términología en castellano. Educ Med. 2019. DOI: 10.1016/j.edumed.2018.12.011. Avance online.
